# Supplementary material for: Herbal Medicine for Adult Patients with Cough Variant Asthma: A Systematic Review and Meta-Analysis
Source: Hindawi journal article supplement (doi:10.1155/2021/5853137), 2021-03-02
Supplement: f1 [file 5853137.f1.pdf]

## SUPPLEMENTARY INFORMATION

### TITLE: Herbal Medicine for Adult Patients with Cough Variant Asthma: A Systematic Review and Meta-analysis

(List available Supplementary Information items in the following order)

**Figure S1-** Risk of bias graph

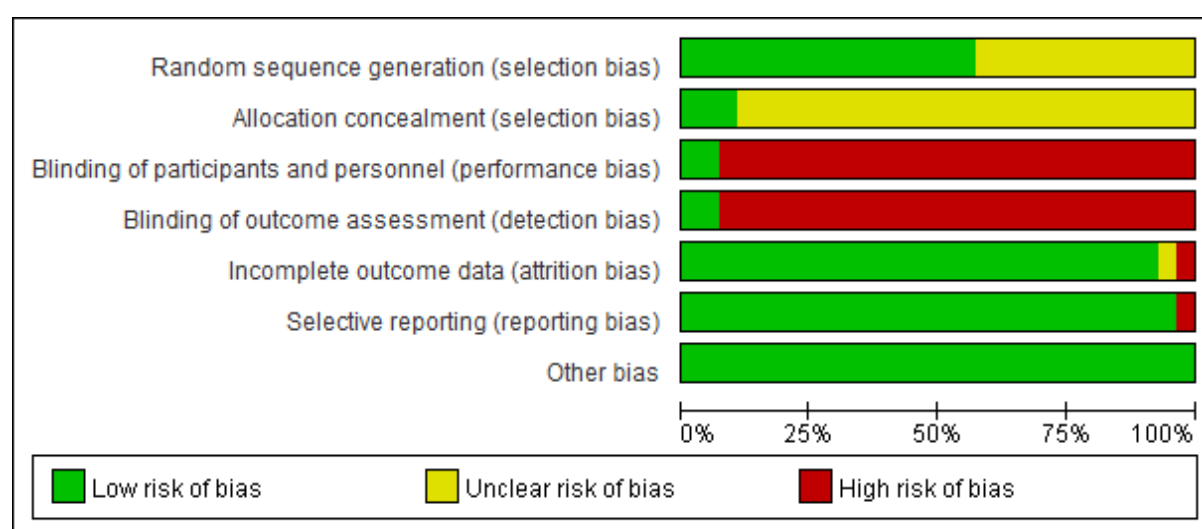

**Figure S2-** Forrest plot of CD4+/CD8+ ratio

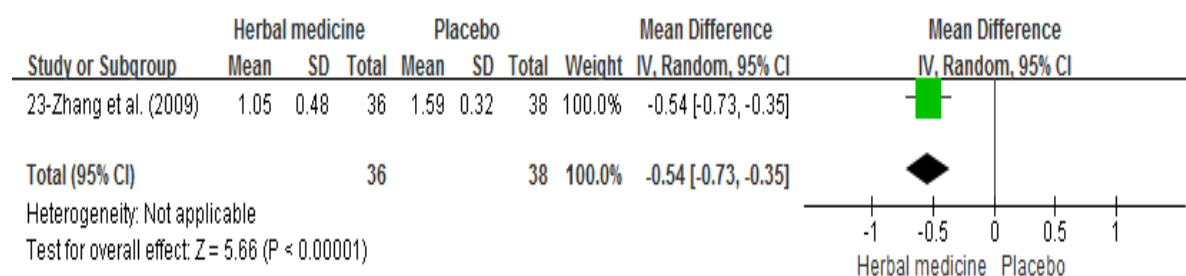

**Figure S3- Forrest plot of Forced Expiratory Volume in One Second (FEV1)**

## A Herbal Medicine versus Montelukast

### (1) FEV<sub>1</sub> (%)

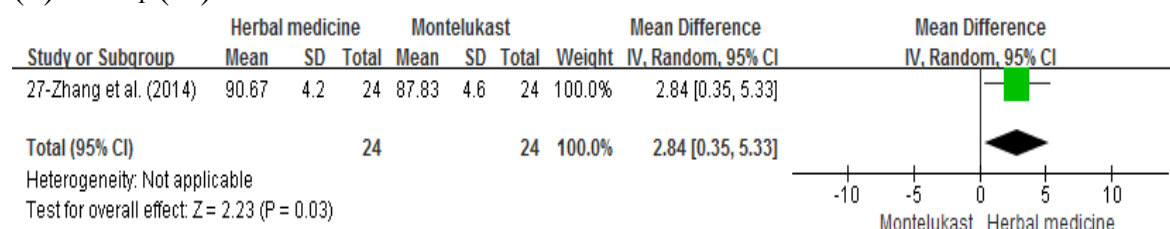

### (2) FEV<sub>1</sub> (L)

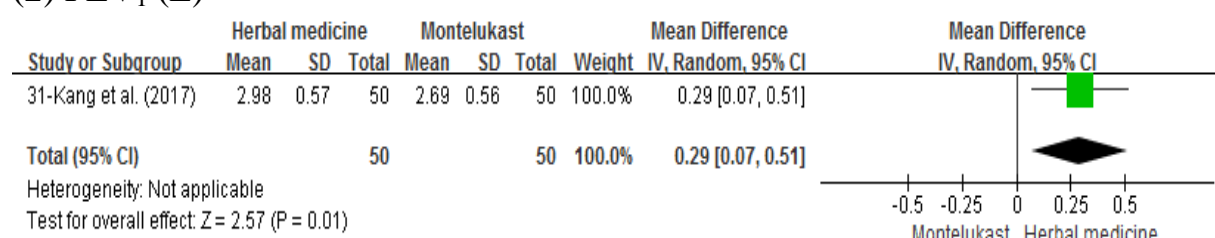

## B Herbal Medicine versus ICS plus Bronchodilator

### (1) FEV<sub>1</sub> (%)

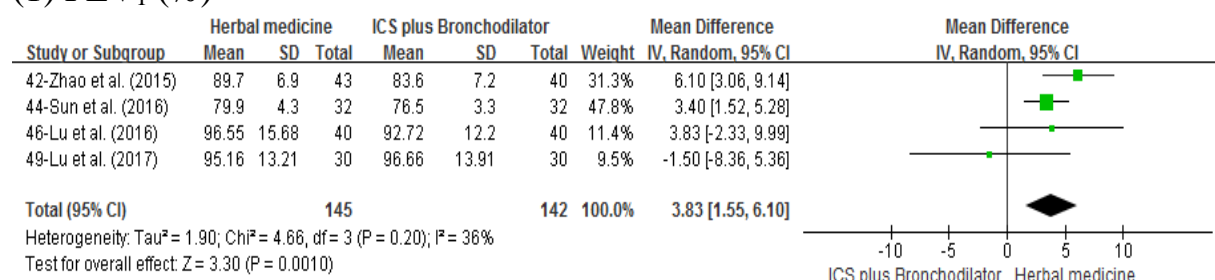

### (2) FEV<sub>1</sub> (L)

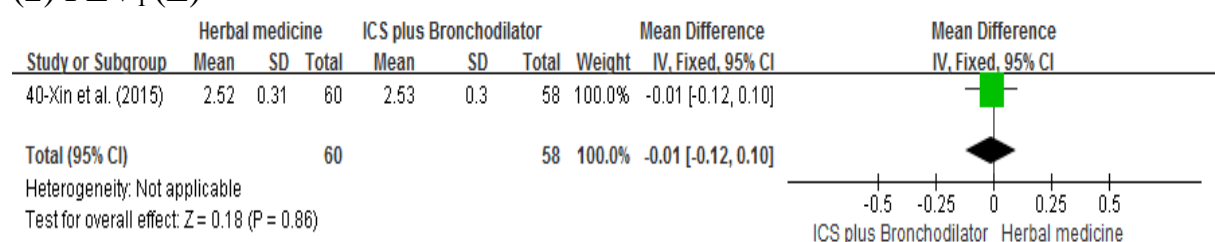

**Figure S3 – A and B, Forrest plot of Forced Expiratory Volume in One Second (FEV1).**

**Figure S4- Forrest plot of effective rate**

## A Herbal Medicine versus Placebo

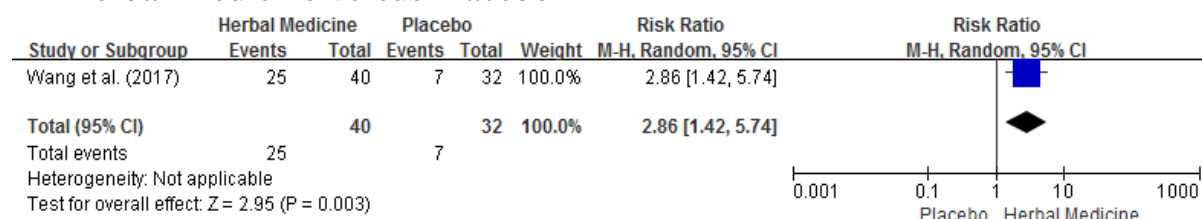

## B Herbal Medicine versus Montelukast

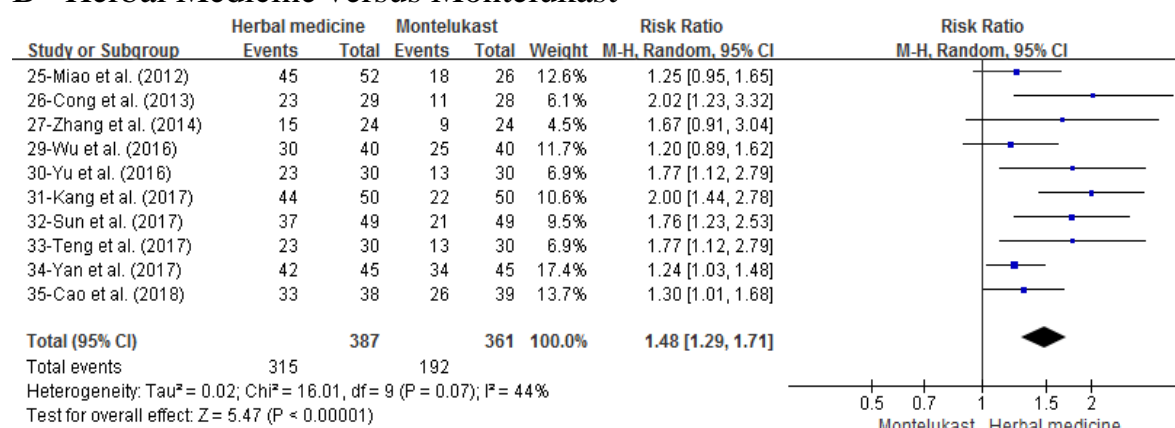

## C Herbal Medicine versus ICS plus Bronchodilator

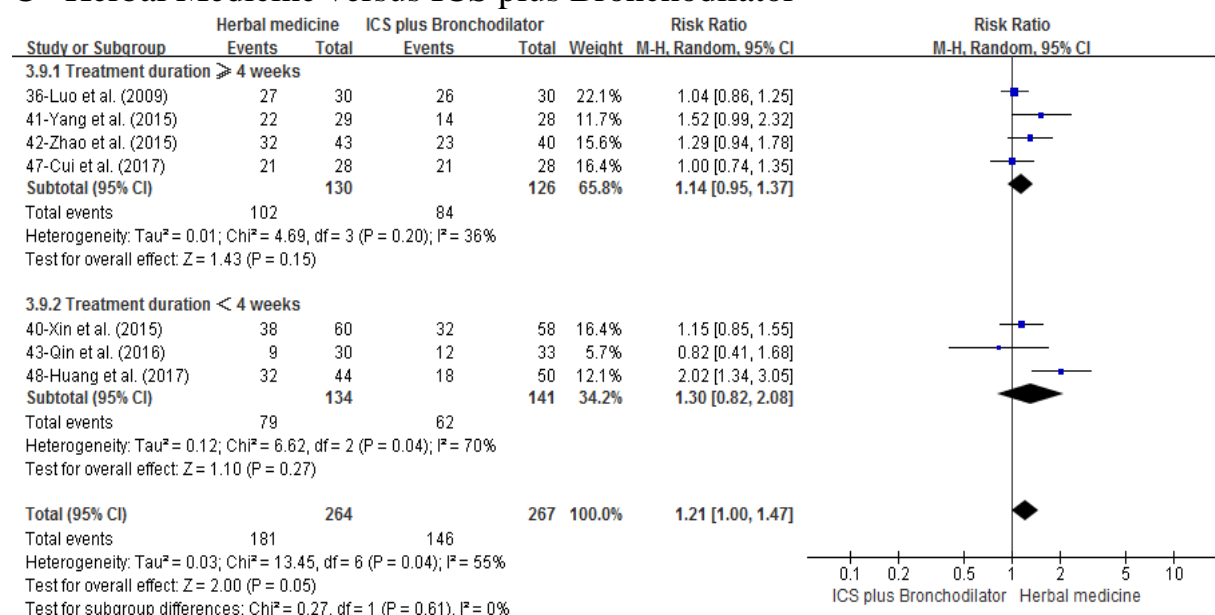

**Figure S4 – A, B and C, Forrest plot of effective rate.**

**Figure S5-** Sensitivity analyses of FEV1 (%) in Herbal Medicine versus ICS plus Bronchodilator

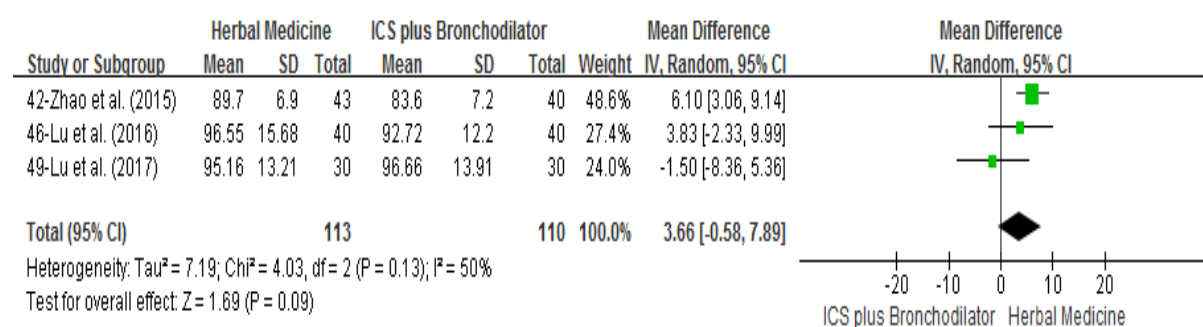

**Table S1- GRADE evaluation of Herbal Medicine vs. Montelukast**

| Outcome                                                                           | Absolute Effect                                                               |             | Relative Effect (95% CI)<br>No. of Participants & Studies                    | Certainty of the Evidence (GRADE) |
|-----------------------------------------------------------------------------------|-------------------------------------------------------------------------------|-------------|------------------------------------------------------------------------------|-----------------------------------|
|                                                                                   | With CHM                                                                      | Without CHM |                                                                              |                                   |
| LCQ<br>Scale from: 3 to 21 <sup>b</sup><br>Treatment duration: Range 2 to 4 weeks | 15.31                                                                         | 13.21       | MD 2.38 (1.32, 3.44)<br><br>Based on data from 422 patients in 6 studies     | ⊕⊕○○<br>LOW <sup>1,2</sup>        |
|                                                                                   | Average difference: 2.38 points higher (95% CI: 1.32 higher to 3.44 higher)   |             |                                                                              |                                   |
| CSS<br>Scale from: 0 to 5 <sup>a</sup><br>Treatment duration: Range 2 to 8 weeks  | —                                                                             |             | SMD -0.80 (-1.08, -0.51)<br><br>Based on data from 454 patients in 6 studies | ⊕⊕⊕○<br>LOW <sup>1,2</sup>        |
| FEV <sub>1</sub> (L)<br>Treatment duration: Range 4 weeks                         | 2.98                                                                          | 2.69        | MD 0.29 (0.07 to 0.51)<br><br>Based on data from 100 patients in 1 study     | ⊕⊕○○<br>LOW <sup>1,3</sup>        |
|                                                                                   | Average difference: 0.29 litres higher (95% CI: 0.07 higher to 0.51 higher)   |             |                                                                              |                                   |
| VAS<br>Scale from: 0 to 10 <sup>a</sup><br>Treatment duration: Range 4 weeks      | 2.61                                                                          | 3.95        | MD -1.34 (-1.82, -0.86)<br><br>Based on data from 77 patients in 1 study     | ⊕⊕○○<br>LOW <sup>1,3</sup>        |
|                                                                                   | Average difference: 1.34 points lower (95% CI: 1.82 lower to 0.86 lower)      |             |                                                                              |                                   |
| Effective rate<br>Treatment duration: Range 2 to 8 weeks                          | 78 per 100                                                                    | 50 per 100  | RR 1.48 (1.29 to 1.71)<br><br>Based on data from 748 patients in 10 studies  | ⊕⊕○○<br>MODERATE <sup>1</sup>     |
|                                                                                   | Difference: 28 more per 100 patients (95% CI: 15 to 38 more per 100 patients) |             |                                                                              |                                   |

The risk in the intervention group (and its 95% confidence interval) is based on the assumed risk in the comparison group and the relative effect of the intervention (and its 95% CI). Abbreviations: CHM, Chinese herbal medicine; CI, confidence interval; CSS, Cough symptom score; FEV<sub>1</sub>, forced expiratory volume-one second; LCQ, Leicester Cough Questionnaire; MD, mean difference; RR, risk ratio; SMD, standardised mean difference; VAS, Visual Analogue Scale.

a. Higher scores indicate more symptoms; b. Higher scores indicate less symptoms.

1. Unclear sequence generation and allocation concealment. Lack of blinding of participants and personnel;
2. Considerable statistical heterogeneity;
3. Small sample size.

**Table S2- GRADE evaluation of Herbal Medicine vs. ICS plus Bronchodilators**

| Outcome                                                                              | Absolute Effect                                                                           |                      | Relative Effect<br>(95% CI)<br>No. of Participants<br>& Studies                                | Certainty of<br>the Evidence<br>(GRADE) |
|--------------------------------------------------------------------------------------|-------------------------------------------------------------------------------------------|----------------------|------------------------------------------------------------------------------------------------|-----------------------------------------|
|                                                                                      | With<br>CHM                                                                               | Without<br>CHM       |                                                                                                |                                         |
| LCQ<br>Scale from: 3 to 21 <sup>b</sup><br>Treatment duration:<br>Range 2 weeks      | <b>15.95</b>                                                                              | <b>14.93</b>         | <b>MD 1.02</b><br>(0.01, 2.05)<br><br>Based on data from 62<br>patients in 1 study             | ⊕⊕○○<br>LOW <sup>1,3</sup>              |
|                                                                                      | Average difference:<br>1.02 points higher<br><br>(95% CI: 0.01 high to<br>2.05 higher)    |                      |                                                                                                |                                         |
| CSS<br>Scale from: 0 to 5 <sup>a</sup><br>Treatment duration:<br>Range 4 to 8 weeks  | -                                                                                         |                      | <b>SMD -0.25 SD</b><br>(-0.89, 0.39)<br><br>Based on data from<br>369 patients in 5<br>studies | ⊕⊕○○<br>LOW <sup>1,2</sup>              |
| FEV <sub>1</sub> (%)<br>Treatment duration:<br>Range 2 to 12 weeks                   | <b>90.33</b>                                                                              | <b>87.37</b>         | <b>MD 3.83</b><br>(1.55 to 6.10)<br><br>Based on data from<br>287 patients in 4<br>studies     | ⊕⊕○○<br>LOW <sup>1,3</sup>              |
|                                                                                      | Average difference:<br>3.83% higher<br><br>(95% CI: 1.55%<br>higher to 6.10%<br>higher)   |                      |                                                                                                |                                         |
| VAS<br>Scale from: 0 to 10 <sup>a</sup><br>Treatment duration:<br>Range 2 to 4 weeks | <b>2.78</b>                                                                               | <b>3.48</b>          | <b>MD -0.67</b><br>(-1.80, 0.46)<br><br>Based on data from<br>281 patients in 4<br>studies     | ⊕○○○<br>VERY<br>LOW <sup>1,2,3</sup>    |
|                                                                                      | Average difference:<br>0.67 points lower<br><br>(95% CI: 1.80 lower to<br>0.46 higher)    |                      |                                                                                                |                                         |
| Effective rate<br>Treatment duration:<br>Range 2 to 8 weeks                          | <b>69</b><br>per 100                                                                      | <b>55</b><br>per 100 | <b>RR 1.21</b><br>(1.00 to 1.47)<br><br>Based on data from<br>531 patients in 7<br>studies     | ⊕⊕○○<br>LOW <sup>1,2</sup>              |
|                                                                                      | Difference: 14 more<br>per 100 patients<br><br>(95% CI: 0 to 26 more<br>per 100 patients) |                      |                                                                                                |                                         |

The risk in the intervention group (and its 95% confidence interval) is based on the assumed risk in the comparison group and the relative effect of the intervention (and its 95% CI). Abbreviations: CHM, Chinese herbal medicine; CI, confidence interval; CSS, Cough symptom score; FEV<sub>1</sub>, forced expiratory volume-one second; LCQ, Leicester Cough Questionnaire; MD, mean difference; RR, risk ratio; SMD, standardised mean difference; VAS, Visual Analogue Scale.

a. Higher scores indicate more symptoms; b. Higher scores indicate less symptoms.

1. Unclear sequence generation and allocation concealment. Lack of blinding of participants and personnel;
2. Considerable statistical heterogeneity;
3. Small sample size.

**Table S3- GRADE evaluation of Herbal Medicine vs. Placebo**

| Outcome                                                                         | Absolute Effect                                                                            |                      | Relative Effect<br>(95% CI)<br>No. of<br>Participants &<br>Studies                       | Certainty of<br>the Evidence<br>(GRADE) |
|---------------------------------------------------------------------------------|--------------------------------------------------------------------------------------------|----------------------|------------------------------------------------------------------------------------------|-----------------------------------------|
|                                                                                 | With<br>CHM                                                                                | Without<br>CHM       |                                                                                          |                                         |
| CSS<br>Scale from: 0 to 5 <sup>a</sup><br>Treatment duration:<br>Range 2 weeks  | <b>2.35</b>                                                                                | <b>3.5</b>           | <b>MD -1.15</b><br>(-1.67, -0.63)<br><br>Based on data from<br>72 patients in 1<br>study | ⊕⊕⊕○<br>MODERATE <sup>1</sup>           |
|                                                                                 | Average difference:<br>1.15 points lower<br><br>(95% CI: 1.67 lower to<br>0.63 lower)      |                      |                                                                                          |                                         |
| VAS<br>Scale from: 0 to 10 <sup>a</sup><br>Treatment duration:<br>Range 2 weeks | <b>3.08</b>                                                                                | <b>4.84</b>          | <b>MD -1.76</b><br>(-2.66, -0.86)<br><br>Based on data from<br>72 patients in 1<br>study | ⊕⊕⊕○<br>MODERATE <sup>1</sup>           |
|                                                                                 | Average difference:<br>1.76 points lower<br><br>(95% CI: 2.66 lower to<br>0.86 lower)      |                      |                                                                                          |                                         |
| CD4+/CD8+ ratio<br>Treatment duration:<br>Range 8 weeks                         | <b>1.05</b>                                                                                | <b>1.59</b>          | <b>MD -0.54</b><br>(-0.73, -0.35)<br><br>Based on data from<br>74 patients in 1<br>study | ⊕⊕⊕○<br>MODERATE <sup>1</sup>           |
|                                                                                 | Average difference:<br>0.54 lower<br><br>(95% CI: 0.73 lower to<br>0.35 lower)             |                      |                                                                                          |                                         |
| Effective rate<br>Treatment duration:<br>Range 2 weeks                          | <b>63</b><br>per 100                                                                       | <b>22</b><br>per 100 | <b>RR 2.86</b><br>(1.42 to 5.74)<br><br>Based on data from<br>72 patients in 1<br>study  | ⊕⊕⊕○<br>MODERATE <sup>1</sup>           |
|                                                                                 | Difference: 41 more<br>per 100 patients<br><br>(95% CI: 9 to 100<br>more per 100 patients) |                      |                                                                                          |                                         |

The risk in the intervention group (and its 95% confidence interval) is based on the assumed risk in the comparison group and the relative effect of the intervention (and its 95% CI). Abbreviations: CHM, Chinese herbal medicine; CI, confidence interval; CSS, Cough symptom score; MD, mean difference; RR, risk ratio; VAS, Visual Analogue Scale.

a. Higher scores indicate more symptoms.

1. Small sample size.
